1     Auditory cortical generators of the Frequency Following Response are  
2                                     modulated by intermodal attention

3     *Running Title:* Auditory cortex underlies attentional modulations of FFR

4

5                                     Thomas Hartmann<sup>1)2)</sup> & Nathan Weisz<sup>1)2)</sup>

6     1. Center of Cognitive Neuroscience, University of Salzburg, Salzburg, Austria

7     2. Department of Psychology, University of Salzburg, Salzburg, Austria

8

9     correspondence:

10    Dr. Thomas Hartmann

11    Paris-Lodron Universität Salzburg

12    Division of Physiological Psychology

13    Hellbrunnerstraße 34

14    5020 Salzburg

15    Austria

16    Phone: +43 (0)662 80445109

17    Fax: +43 (0) 662 / 8044 - 5126

18    E-mail: Nathan.Weisz@sbg.ac.at

19 **Abstract**

20           The vast efferent connectivity of the auditory system suggests that subcortical  
21 (thalamic and brainstem) auditory regions should also be sensitive to top-down processes  
22 such as selective attention. In electrophysiology, the Frequency Following Response (FFR)  
23 to simple speech stimuli has been used extensively to study these subcortical areas. Despite  
24 being seemingly straight-forward in addressing the issue of attentional modulations of  
25 subcortical regions by means of the FFR, the existing results are highly inconsistent.  
26 Moreover, the notion that the FFR exclusively represents subcortical generators has been  
27 recently challenged. By applying these techniques to data recorded from 102  
28 magnetoencephalography (MEG) magnetometers in 34 participants during a cross-modal  
29 attention task, we aimed to gain a more differentiated perspective on how the generators of  
30 the FFR are modulated by either attending to the visual or auditory input. In a first step our  
31 results confirm the strong contribution of also cortical regions to the FFR. Interestingly, of all  
32 regions exhibiting a measurable FFR response, only the right primary auditory cortex was  
33 significantly affected by intermodal attention. By showing a clear cortical contribution to the  
34 attentional FFR effect, our work significantly extends previous reports that focus on surface  
35 level recordings only. It underlines the importance of making a greater effort to disentangle  
36 the different contributing sources of the FFR and serves as a clear precaution of  
37 simplistically interpreting the FFR as brainstem response.

38 *Keywords:* FFR, brainstem, auditory cortex, attention, MEG

39 Analogous to other sensory modalities, neural activity in the auditory system is  
40 modulated by selective attention (Fritz et al. 2007; Frey et al. 2014; Mazaheri et al. 2014;  
41 Weise et al. 2016; Salo et al. 2017). Electrophysiological research has also focussed on  
42 oscillatory activity in cortical brain regions, revealing modulations in the auditory cortex  
43 similar to those reported in the visual domain (Händel et al. 2011) or somatosensory regions  
44 (Haegens et al. 2011). These findings point to alterations of gain in sensory cortical regions  
45 to select or ignore features respectively (e.g. gating by inhibition (Jensen and Mazaheri  
46 2010)) that are modality-independent (Lee et al. 2012; Choi et al. 2013; Frey et al. 2014).  
47 Despite these similarities at the cortical level, compared to the visual modality the auditory  
48 system is characterized by a more extensive and complex subcortical architecture, including  
49 abundant efferent neural connections (Winer 2006; Suga 2008; Chandrasekaran and Kraus  
50 2010; Terreros and Delano 2015). Within this efferent system, the primary auditory cortex is  
51 a hub region with direct efferent connections to all major subcortical areas (Winer 2006;  
52 Suga 2008; Chandrasekaran and Kraus 2010; Terreros and Delano 2015). In principle,  
53 auditory cortical processes could affect cochlear activity via only two synapses (Winer 2006;  
54 Suga 2008; Dragicevic et al. 2015). These corticofugal modulations are essential in adapting  
55 responses of subcortical neurons, for example, by modulating their spectral tuning curves  
56 (Suga 2008; Felix et al. 2018). However, the extent to which subcortical auditory brain  
57 regions are implicated in selective attentional modulation is not well established.

58 Recently, Slee and David (Slee and David 2015) reported attentional modulation of  
59 receptive fields of inferior colliculus (IC) neurons in ferrets. In humans functional magnetic  
60 resonance imaging (fMRI) has shown modulation of IC activity by selective auditory attention  
61 (Rinne et al. 2008; Riecke et al. 2018) and increases of BOLD activity with attentional  
62 demand in brainstem structures in an audiovisual attention task (Raizada and Poldrack  
63 2007). Since all efferent connections to the cochlea are mediated via the Superior Olive,  
64 further suggestive support for subcortical attentional modulations can be derived from  
65 studies on otoacoustics emissions (OAEs), a proxy for outer hair cell activity in the cochlea.

66 Attentional modulations of OAEs have been found when either the left or the right ear had to  
67 be attended (Giard et al. 1994), one out of two frequencies was task relevant (Maison et al.  
68 2001) or attention had to be focused on the visual or auditory modality (Wittekindt et al.  
69 2014). While limited in number, these studies in animals and humans suggest the sensitivity  
70 of brainstem structures to selective attention. However, the picture remains incomplete.  
71 Studies in the animal model are only suggestive that similar processes also exist in humans.  
72 At the same time invasive recordings from brainstem structures are not feasible in healthy  
73 humans. Studies using fMRI studies are non-invasive and provide excellent spatial  
74 resolution. Yet, scanner noise creates a challenging environment for such studies, and the  
75 technique is also not well suited for some populations in which the study of brainstem  
76 processes may be of interest (e.g. cochlear implant patients). Furthermore, the  
77 aforementioned complex auditory corticofugal architecture strongly suggests complex  
78 interactions of the areas and nuclei involved which can only be captured with recording  
79 methods providing high temporal resolution. Therefore other methods are needed to  
80 complement the invasive and neuroimaging approaches.

81 A popular method to noninvasively assess auditory neural activity with high temporal  
82 resolution is to use magnetoencephalography (MEG) and/or electroencephalography (EEG).  
83 Convincingly capturing attentional modulations of subcortical auditory regions using these  
84 techniques has proven challenging, however. Many initial studies focussed on the  
85 components of the auditory brainstem response (ABR) (Jewett et al. 1970). The ABR is the  
86 evoked response to a high number of repetitions (typically >5000) of a short sound like a  
87 click. The ABR peaks have been related to the processing of the sound at the various  
88 subcortical nuclei (Jewett et al. 1970; Don and Eggermont 1978; Møller et al. 1981; Møller  
89 and Jannetta 1983; Boston and Møller 1985; Møller and Burgess 1986; Chandrasekaran  
90 and Kraus 2010; Skoe and Kraus 2010). It has been used to study plasticity processes of the  
91 subcortical auditory system (Musacchia et al. 2007; Tzounopoulos and Kraus 2009;  
92 Chandrasekaran and Kraus 2010; Chandrasekaran et al. 2014; Kraus and Nicol 2014) and

93 is widely applied in clinical settings (Eggermont et al. 1980; Møller and Møller 1983;  
94 Eggermont and Don 1986; Eggermont and Salamy 1988; van Straaten 1999; Stipdonk et al.  
95 2016). However, attentional modulation of ABR components have not been found thus far  
96 (Woldorff et al. 1987; Hackley et al. 1990).

97 Another way to use EEG to eavesdrop on subcortical activity is to investigate neural  
98 responses to complex sounds such as simple consonant-vowel combinations (e.g. /da/  
99 sound). While the transient part is equivalent to the classical ABR, the sustained part is an  
100 oscillatory response that is strictly phase-locked to the stimulus, in particular its fundamental  
101 frequency (F0) (Greenberg 1980; Galbraith et al. 1995; Russo et al. 2004; Akhoun et al.  
102 2008; Chandrasekaran and Kraus 2010; Skoe and Kraus 2010). This sustained response,  
103 commonly named the frequency-following response (FFR), is assumed to be mainly  
104 generated by subcortical auditory nuclei, with the IC playing a central role (Worden and  
105 Marsh 1968; Batra et al. 1986; Chandrasekaran and Kraus 2010). Support for this notion has  
106 come from studies in animals (Marsh et al. 1974; Rouiller et al. 1979; Liu et al. 2006;  
107 Wallace et al. 2007). Given these findings and the general notion that the auditory cortex  
108 does not track or hardly tracks frequencies beyond 100Hz (Kuwada et al. 2002;  
109 Chandrasekaran and Kraus 2010), the FFR has thus been seen as a proxy to subcortical  
110 auditory activity. Past studies on the attentional modulation of the FFR have found  
111 inconsistent results. While some find in favor ((Galbraith et al. 2003; Hoormann et al. 2004;  
112 Lehmann and Schönwiesner 2014); for an alternative innovative method exploiting the  
113 neural response to the F0 showing attentional modulations, see (Forte et al. 2017)), negative  
114 results have been reported as well (Varghese et al. 2015). It should be noted that all  
115 mentioned studies used data from a small number of EEG electrodes, sometimes only one.  
116 Since the subcortical generation of the FFR has been widely accepted, the presence or  
117 absence of attentional modulations in the aforementioned studies has been attributed to  
118 subcortical structures without much scrutiny.

119           However, besides the general controversy pertaining to its attentional modulation, the  
120 view of an exclusive brainstem localization of the FFR has been recently challenged by  
121 Coffey and colleagues (Coffey et al. 2016) for human participants (for similar guinea pig data  
122 see (Wallace et al. 2000)). Using MEG and EEG concurrently, they confirmed that the ABR  
123 can be acquired with MEG as previously shown by Parkkonen and colleagues (Parkkonen et  
124 al. 2009). More importantly, they showed that the FFR can be acquired with MEG as well.  
125 Using source projection, FFR activity was present in all auditory subcortical nuclei (i.e.  
126 brainstem and thalamic) but most importantly significant auditory cortical contributions were  
127 also identified. The latter finding has important implications concerning past studies using  
128 the FFR. If the FFR has cortical components, it is certainly possible that any reported  
129 attentional effect could have cortical origins instead of or in addition to subcortical ones. It  
130 clearly follows that the source of any effect in an FFR paradigm should be determined by  
131 source analysis techniques (Hämäläinen and Ilmoniemi 1994; Van Veen et al. 1997; Gross  
132 et al. 2001; Lin et al. 2006). Additionally, reporting the onset latency and temporal dynamics  
133 of the FFR along with the reported effects becomes crucial, which is not common in current  
134 practice (e.g. (Galbraith et al. 2003; Lehmann and Schönwiesner 2014; Varghese et al.  
135 2015)). Studies that report the FFR onset latency estimate it to be between 6 and 10ms  
136 (Hoormann et al. 2004; Russo et al. 2004). This time-window overlaps with estimates of the  
137 amount of time necessary for the first volley of activity to reach the auditory cortex which is  
138 around ~9ms (Liegeois-Chauvel et al. 1991; Brugge et al. 2008, 2009). In order to scrutinize  
139 the subcortical and cortical effects of attention on the FFR, we acquired data with whole-  
140 head MEG in a cross-modal attention paradigm. We confirmed the strong cortical  
141 contributions to the FFR as reported by Coffey and colleagues (Coffey et al. 2016) and  
142 furthermore showed that attentional modulations of the FFR affects only cortical regions.

## 143 **Materials and Methods**

### 144 *Participants*

145           38 volunteers (19 females) took part in the experiment and provided written informed  
146 consent. At the time of data acquisition, the average age of the participants was 24.4 years  
147 (SD: 6.1). Two of these participants had to be excluded because not all six runs were  
148 recorded. One participant was excluded because of excessive power in the time frequency  
149 data. One further participant was excluded because more than six sensors were marked as  
150 bad by the RANSAC algorithm. The final sample of participants included 34 volunteers (19  
151 females) with an average age of 24.4 years (SD: 6.3). All participants reported no previous  
152 neurological or psychiatric disorder, and reported normal or corrected -to -normal vision. The  
153 experimental protocol was approved by the ethics committee of the University of Salzburg  
154 and was carried out in accordance with the Declaration of Helsinki.

### 155 *Stimulation Paradigm*

156           Stimulation was controlled by a custom Matlab script using the Psychophysics  
157 Toolbox (Brainard 1997; Kleiner et al. 2007). Stimulus presentation and exact timing was  
158 ensured by using the VPixx System (DATAPixx2 display driver, PROPixx DLP LED  
159 Projector, TOUCHPixx response box by VPixx Technologies, Canada). We used the  
160 Blackbox2 Toolkit (The Black Box ToolKit Ltd, Sheffield, UK) to measure and correct for  
161 timing inaccuracies between triggers and the visual and auditory stimulation.

162           The participants performed six runs of a crossmodal attention task (see **Figure 1**).  
163 For each of the 85 trials, an attentional cue indicated whether the participant had to react to  
164 a rare oddball in either the visual or auditory domain. Each trial started with a central fixation  
165 cross, presented for 500ms followed by the attentional cue (picture of an eye or an ear)  
166 presented for 500ms. A fixation cross appeared for 1000ms, followed by the audiovisual  
167 stimulation. The auditory stimulation consisted of 30 repetitions of a /da/ sound with an

168 effective fundamental frequency of 114Hz, lasting 40ms (King et al. 2002; Skoe and Kraus  
169 2010). Each presentation of the /da/ sound was followed by 50ms of silence. For the  
170 duration of the auditory stimulation, a vertically oriented gabor patch (visual angle: spatial  
171 frequency: 0.01 cycles/pixel, sigma: 60) was presented at the center of the screen. 15 of the  
172 85 trials were target trials. If eight target trials had a visual target, the other seven target  
173 trials had an auditory target and vice versa. In visual target trials, the gabor patch was tilted  
174 by 10° to the left for 270ms anywhere during the presentation time. In auditory trials, three  
175 consecutive presentations of the /da/ sound were reversed. The participants had to press a  
176 button with their right thumb if the current trial was a target trial of the cued modality. They  
177 were allowed to answer as soon as the target occurred. After the audiovisual stimulation had  
178 finished, participants were given an additional 300ms to answer in order to account for target  
179 trials in which the targets appeared towards the end. After each trial, a smiley was presented  
180 for 1000ms, indicating whether the (non)response of the participant was correct or incorrect.

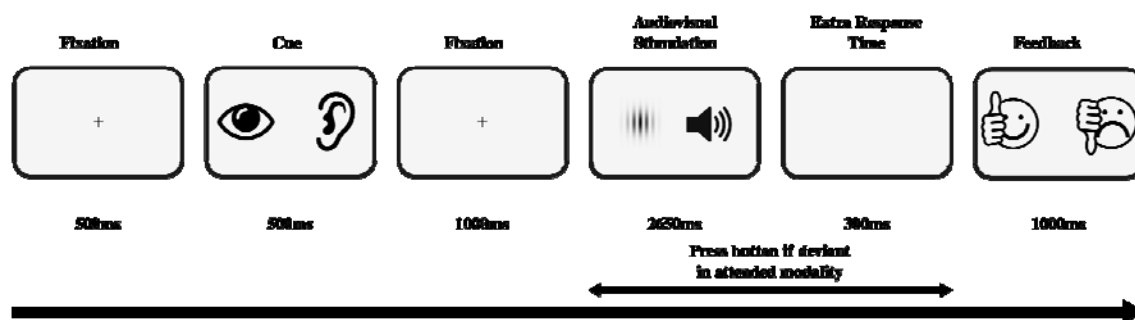

**Figure 1:** Timeline of the trials of experimental paradigm.

### 181 *Data acquisition*

182 Concurrent acquisition of the magnetic and electrical signal was performed at a  
183 sampling frequency of 5000Hz (hardware filters: 0.1 - 1600Hz) using a whole-head MEG  
184 system (Elekta Neuromag Triux, Elekta Oy, Finland), placed in a magnetically shielded room  
185 (AK3b, Vacuumschmelze Hanau, Germany). Brain activity was sampled from 102  
186 magnetometers, 204 orthogonally placed gradiometers and 128 EEG channels. Only the  
187 data from the magnetometers are reported due to their greater sensitivity to deep sources as



188 compared to gradiometers. The data quality of the EEG recording was not sufficient for the  
189 analysis: movement artifacts were excessive in amplitude, probably due to the participants'  
190 heads touching the surface of the MEG helmet, and many EEG channels showed excessive  
191 noise for currently unknown reasons.

## 192 *Data preprocessing*

193 Preprocessing of the MEG data was done in a two-step approach. In a first step  
194 Signal Space Projection (SSP) was applied to remove exogenous contaminations (Uusitalo  
195 and Ilmoniemi 1997). Further data cleaning was performed using a fully automated approach  
196 implemented in the autoreject package (version 0.1 running on Python 3.6.8) (Jas et al.  
197 2016, 2017). Specifically, we used autoreject to identify bad sensors and periods containing  
198 artifacts, which were subsequently discarded. This approach is detailed in the following  
199 paragraph.

200 Because common artifacts in MEG data are found in rather low frequencies, the data  
201 of each run were bandpass filtered between 1-40Hz (FIR filter with hann window, low  
202 transition width: 0.1Hz, high transition width: 4Hz, filter length: 165001). The filtered data  
203 were then split into epochs of 1s because the algorithms provided by autoreject require  
204 epoched data. Each epoch was further downsampled to 500Hz to increase the speed and  
205 decrease the computational demands of the artifact identification algorithms. We first applied  
206 the RANSAC algorithm to identify sensors that contained data that were highly dissimilar to  
207 those of the other sensors (Fischler and Bolles 1981; Bigdely-Shamlo et al. 2015; Jas et al.  
208 2017). If a sensor was marked as bad by the RANSAC algorithm in one run, the sensor was  
209 excluded for all runs of the respective participant. If the total number of bad sensors  
210 exceeded five, the data of the participant were rejected, leading to the exclusion of one  
211 participant. The remaining data were subjected to the "local autoreject" algorithm (Jas et al.  
212 2016, 2017) to identify which of the 1s periods contained artifacts. The exact parameters for  
213 the RANSAC and "local autoreject" algorithms can be found in the supplementary material.

214 Each 1s period that was marked as bad by the algorithm was discarded from further  
215 analysis. Subsequent analysis on cleaned data was carried out using the open source MNE-  
216 Python toolbox (version 0.17.2 running on Python 3.6.8) (Gramfort et al. 2013, 2014).  
217 Statistical analysis was performed using Eelbrain version 0.29.5 (Brodbeck n.d.).  
218 Perceptually uniform colormaps ((Kovesi 2015); (Bedna n.d.)) were used for all color-coded  
219 figures.

220 We bandpass filtered (FIR filter with hann window, passband: 80-2000Hz, low  
221 transition width: 5Hz, high transition width: 100Hz, filter length: 3301) the raw data, followed  
222 by a bandstop filter to eliminate line noise contamination (FIR filter with hann window, stop  
223 bands at 50Hz and multiples up to 1950Hz, transition width: 1Hz, filter length: 33001). We  
224 extracted epochs of data in the time window of 60ms before to 120ms after the onset of each  
225 individual auditory stimulus, accounting for a 16ms delay introduced by the tubes of the  
226 MEG-proof sound system and 7ms delay inherent to the sound file we used. In order to  
227 reduce possible contamination of the auditory signal by the visual evoked response, the first  
228 four auditory stimuli of every trial were discarded. We further discarded all target trials and  
229 trials in which a false positive response was given by the participant. The remaining trials  
230 were averaged within their respective condition (attend visual / attend auditory) in order to  
231 compute the attention effect. A further average of all trials of each participant was calculated  
232 in order to locate the FFR in time, frequency and space.

### 233 *Sensor Space Analysis*

234 We applied a wavelet transform around the fundamental frequency of the stimulus  
235 (Morlet Wavelets, six cycles, 104-124Hz,  $\Delta f=2\text{Hz}$ ,  $\Delta t=1\text{ms}$ ) on the averaged data. In order to  
236 exclude any remaining outliers from the analysis, the resulting power values were averaged  
237 within each participant. The individual power values were Z-transformed and those  
238 participants whose average power was three standard deviations below or above the group

239 average were excluded. This lead to the exclusion of one participant ( $z=4.89$ ). We computed  
240 the power envelope of the FFR by first averaging over all frequency bins.

241 In order to visualize the FFR on sensor level, the power values were first averaged  
242 over all remaining magnetometers within every participant. The average power and standard  
243 deviation over all participants was subsequently calculated and resulted in an FFR response  
244 peaking at 51ms after stimulus onset as shown in **Figure 2a**.

245 In order to test our principle hypothesis that FFR activity was higher when the  
246 auditory modality was attended, we applied a cluster-based nonparametric, threshold free  
247 permutation-based statistic (Maris and Oostenveld 2007; Smith and Nichols 2009)  
248 (dependent samples t-test, 10000 permutations, channel neighborhood structure provided by  
249 MNE Python) to the data, restricted to the time-window between stimulus onset to 90ms  
250 later.

### 251 *Source Space Analysis*

252 Nine of the 35 participants included in the final analysis provided us with high-quality  
253 T1 MR images. These MRIs were segmented with Freesurfer (Fischl 2012). Alternatively,  
254 the average brain provided by Freesurfer (fsaverage) was morphed to the participants'  
255 headshape. The surface of the inner skull was either extracted using Freesurfer (Fischl  
256 2012) if the individual anatomical images were available or determined by applying the  
257 transforms used for morphing the average brain to the participants' headshapes. The  
258 coordinate frames of the MR images and the MEG sensor positions were coregistered using  
259 MNE Python (Gramfort et al. 2013, 2014). We subsequently computed a one-layer  
260 boundary-element model (BEM) (Akalin-Acar and Gençer 2004) to accurately model the  
261 propagation of magnetic fields from generators in the brain to the sensors. We constructed  
262 the cortical source space using 4098 sources, each covering approximately 24mm<sup>2</sup>. In order  
263 to estimate activity at the brainstem and the thalamus, the surface-based source space was  
264 combined with a volumetric source space, placing equidistant source of 5mm spacing in the

265 regions labeled “Brainstem”, “Left-Thalamus-Proper” and “Right-Thalamus-Proper”, as  
266 defined in the “aseg” atlas (Filipek et al. 1994; Seidman et al. 1999; Fischl 2012). Further  
267 cortical regions of interest (ROI) were defined using the HCP-MMP1.0 atlas (Glasser et al.  
268 2016) morphed to the individuals’ anatomy. Similar to Coffey and colleagues (Coffey et al.  
269 2016), we used the Primary auditory cortex (A1) as the cortical ROI and defined the  
270 orbitofrontal cortex (OFC) as the control region. Evoked sensor space activity was projected  
271 to the defined sources using the Minimum Norm Estimate method (Hämäläinen and  
272 Ilmoniemi 1994) with a depth weighting coefficient of 0.8 (Lin et al. 2006). We subsequently  
273 applied a wavelet transform with the same parameters used in the sensor space analysis to  
274 all orientations of every source the data were projected to. The power values within each  
275 source were combined by summing the values of the three orientations. As for the sensor  
276 space data, we obtained the power envelope of the FFR by averaging the power over all  
277 frequency bins. This approach resulted in data for sources on the cortical surface and the  
278 previously defined subcortical regions. In order to assess cortical contributions to the FFR  
279 and the attention effect, we morphed these cortical sources to the average brain (fsaverage)  
280 provided by Freesurfer. To visualize the cortical attention effect, we calculated T-values  
281 (dependent samples, one tailed). For the subsequent ROI analysis, we averaged the power  
282 time-courses of each source belonging to each of the ROIs defined above.

283         The first question we wanted to answer was whether FFR-related activity was higher  
284 in the cortical and subcortical auditory regions compared with the two control regions (OFC,  
285 left and right hemisphere). We therefore averaged the power of the two control regions. We  
286 then applied the same cluster-based, threshold-free permutation statistics (Maris and  
287 Oostenveld 2007; Smith and Nichols 2009) (dependent samples t-test, 10000 permutations,  
288 one-tailed) that we used for the sensor data to contrast the power of each of the putatively  
289 auditory ROIs with the power of the averaged control region.

290         The second and crucial question we tried to answer was which of the ROIs were  
291 affected by the attentional modulation. We therefore contrasted the power during auditory vs.

292 visual attention at each of the ROIs individually, again using the same cluster-based,  
293 threshold-free permutation statistics (Maris and Oostenveld 2007; Smith and Nichols 2009).

## 294 **Results**

### 295 *Behavioral Results*

296 Behavioral response data showed that participants gave the correct response in 99%  
297 (SD: 0.7%) of the trials. When a target was presented in the cued sensory domain,  
298 participants correctly gave a response in 95% (SD: 3.1%) of the respective trials. False  
299 responses to targets without triggers were given in only 0.1% (SD: 0.3%) of the trials.

### 300 *Sensor space analysis*

301 In a first step, we analyzed the temporal dynamic of the FFR in sensor space and  
302 subsequently compared the data acquired during the “attend auditory” and the “attend  
303 visual” condition. The power envelope showed an evoked response to the sound stimulus  
304 peaking at ~51ms after stimulus onset (see **Figure 2B**). The topography of the response  
305 shows a bilateral activation pattern, mostly over temporal regions, lateralized to the right  
306 hemisphere (see **Figure 2A**). Since meaningful control regions cannot be defined on the  
307 sensor level, we refrained from further statistical analysis.

308 The cluster-based nonparametric, threshold-free permutation-based statistics for the  
309 impact of the attentional modulation shows that the FFR response is significantly larger  
310 when attention is focused on the auditory domain ( $p=0.035$ , see **Figure 3B**). The effect is,  
311 however, restricted to a rather short and late period after stimulus onset (66ms - 74ms). It  
312 also does not coincide with the maximum of the FFR itself. This low power and specificity is  
313 likely due to an interaction between the low spatial specificity of the magnetometers and the  
314 fact that the average over all magnetometers was analyzed. **Figure 3A** shows the  
315 topography of the comparison between the two conditions at the time of the maximum power

316 of the FFR. It suggests a weak overlap with the topography of the FFR itself (see **Figure**  
317 **2A**). This analysis confirms the presence of the FFR in sensor space and is suggestive yet  
318 not conclusive with respect to its modulation by selective (intermodal) attention.

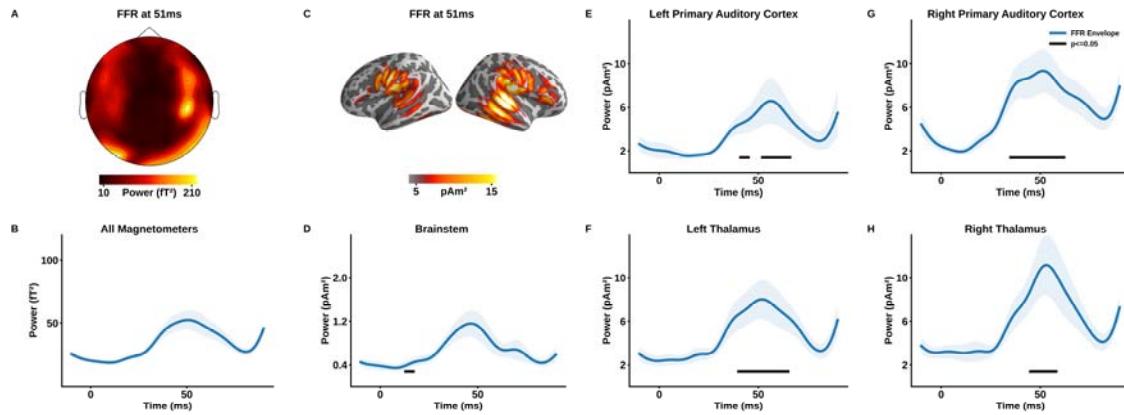

319

320 **Figure 2:** The Frequency Following Response (FFR) in sensor and source space. A)  
321 Topography of the FFR at the time of maximum power. B) Timecourse of the evoked  
322 response at the fundamental frequency (f<sub>0</sub>) of the stimulus averaged over all  
323 magnetometers. Shaded error bars denote the standard error. C) Source reconstruction  
324 of the FFR at the time of maximum power. D-H) Timecourse of the evoked response at the f<sub>0</sub>  
325 for the 5 ROIs. Shaded error bars represent the standard error. The black bar at the bottom  
326 of each panel represents the temporal extents of the clusters in which the respective ROI  
327 showed a higher response than the orbitofrontal cortex, used as a control region.  
328

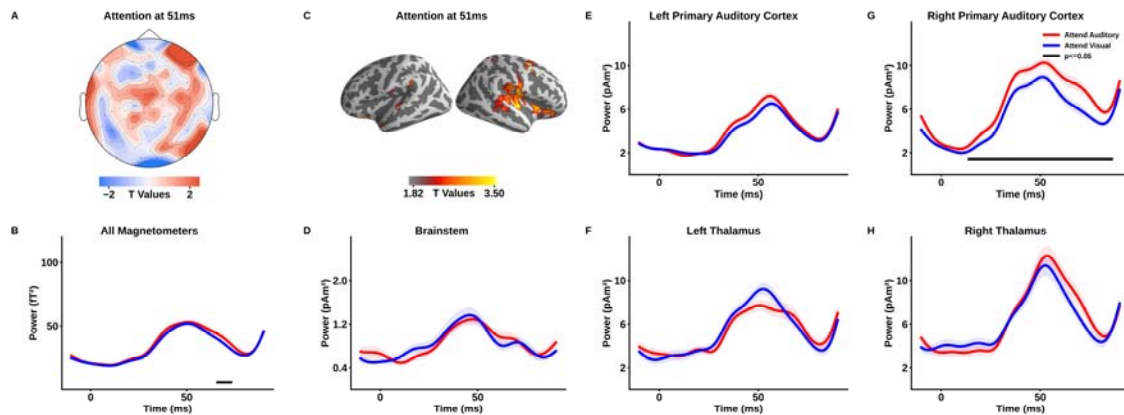

329

330 **Figure 3:** The attention effect in sensor and source space. A) Topography of the attention  
331 effect at the time of maximum power of the FFR. B) Timecourses of the FFR when attention  
332 was directed to the auditory domain and the visual domain. Shaded error bars denote the  
333 standard error of the mean for within-subjects designs (Morey and Others 2008). The black  
334 bar at the bottom of the panel represents the timeframe in which the FFR was higher when  
335 the auditory domain was attended. C) Source reconstruction of the attention effect. D-H)  
336 Timecourse of the FFRs to both conditions. For details, refer to the description of panel B.

### 337 *Source space analysis*

338 After confirming the presence of the FFR as well as finding suggestive evidence for  
339 the hypothesized attentional modulation in sensor space, the next step was to locate the  
340 respective generators. Importantly, we wanted to reveal possibly different contributions by  
341 cortical and subcortical sources. Source projection of the FFR showed strong cortical  
342 contributions, lateralized to the right hemisphere (See **Figure 2C**). The maximum power was  
343 found at the Auditory 4 complex, an auditory region ventral to the primary auditory cortex.  
344 The activity is rather widespread, including the primary auditory cortex as well as ventral  
345 temporal, parietal and prefrontal regions. The ROI analysis statistically confirmed this notion  
346 (see **Figure 2D-H**). All five ROIs showed responses to the stimulus at its fundamental  
347 frequency. In order to quantify whether the response was specific to the ROI, the envelope  
348 at each ROI was statistically contrasted to the envelope at a control region in the  
349 orbitofrontal cortex. This analysis showed that all ROIs generated a significantly stronger  
350 FFR than the control region (see **Figure 2**). The time periods of the significant increases of  
351 all ROIs except the Brainstem were well within the range of the sensor-level FFR. The  
352 Brainstem ROI on the other hand showed the familiar peak at approximately the same time  
353 as the sensor level data and the other four ROIs. However, significant FFR increases were  
354 obtained only for a period between 13ms and 18ms after stimulus onset (for details see  
355 *Supplementary Table 1*).

356 The cortical areas showing attentional modulation of the FFR are mostly restricted to  
357 the right hemisphere and cover early auditory regions as well as regions in the tempo-  
358 parieto-occipital junction, the lateral prefrontal cortex and ventral parietal areas (see Figure  
359 3C). These regions also strongly overlap with those found to show general FFR-related

360 activity. The ROI analysis indicated that the attention effect was exclusive to the right  
361 primary auditory cortex ( $p=0.0005$ ). Although **Figure 3** descriptively suggests a trend for the  
362 right thalamus, the attention effect fails to reach significance at that area ( $p=0.203$ ). This is  
363 also the case for the left thalamus ( $p=0.619$ ), the brainstem ( $p=0.402$ ) and the left primary  
364 auditory cortex ( $p=0.164$ ).

365         These results strongly indicate that although we were able to record subcortical —  
366 especially thalamic — contributions to the FFR, only cortical contributions to the attentional  
367 process could be found in the data.

## 368 **Discussion**

369         It is commonly accepted that the FFR can be used as a proxy to subcortical activity  
370 which is otherwise hard to detect in the MEG and EEG (Chandrasekaran and Kraus 2010;  
371 Skoe and Kraus 2010). The rationale behind this assumption is that only subcortical areas  
372 exhibit the strict phase-locking behavior at frequencies above 100Hz (corresponding to the  
373 typical  $F_0$ ) that are commonly used for the stimuli and that the onset latency is too early for  
374 cortical generators (Wallace et al. 2000; Skoe and Kraus 2010). These assumptions have  
375 been recently challenged by a study by Coffey and colleagues (2016) that shows strong  
376 cortical contributions to the FFR and by studies showing that the auditory cortex reacts to  
377 sound stimulation as early as 8-9ms after stimulus onset (Liegeois-Chauvel et al. 1991;  
378 Brugge et al. 2008, 2009). The quasi-automatic attribution of experimental effects on  
379 properties of the FFR to subcortical areas thus needs to be revisited.

380         The FFR has been widely used to study top-down effects of attention on subcortical  
381 auditory areas with inconsistent results (Galbraith et al. 2003; Hoormann et al. 2004;  
382 Lehmann and Schönwiesner 2014; Varghese et al. 2015; Forte et al. 2017). Yet, none of  
383 these studies used current source projection algorithms to estimate the location of the  
384 generators of the reported signals and only some (Hoormann et al. 2004; Russo et al. 2004;  
385 Forte et al. 2017) showed the temporal dynamics. The current study is the first that uses the



386 unique strength of the MEG — with its excellent temporal resolution and good spatial  
387 resolution — to scrutinize the spatial location of a possible attention-related effect on the  
388 FFR without assuming the location of its generators a priori. In sensor space, the attention  
389 effect is found considerably later than the FFR, already pointing towards cortical generators.  
390 In fact, the simple FFR activation as well as the attention effects outlast the actual period of  
391 stimulation, arguing for some reverberatory processes. Overall, the source space analysis  
392 confirms the sensor-level finding but also significantly expands it. Firstly, we show next to  
393 subcortical generators (brainstem at early and thalamus at later time-periods) of the FFR  
394 also strong contributions of auditory cortex. This part of the study confirms that the FFR can  
395 be detected using MEG (Coffey et al. 2016) as well as recent findings that the origin of the  
396 FFR is not restricted to subcortical areas (Wallace et al. 2000; Coffey et al. 2016). Also the  
397 temporal evolution of the FFR in line with the study by Coffey and colleagues, with a peak  
398 reached at ~51ms, with the exception of brainstem where significant activation (as compared  
399 to the control region) was identified significantly earlier at ~13ms. These results may point to  
400 indeed an earlier “feedforward” projection of phase-locked activity involving the brainstem,  
401 whereas the later portions of the FFR (including those following the stimulus offset) may be  
402 more driven by cortico-thalamic interactions. These aspects are beyond the scope of the  
403 current study, but open up interesting perspectives in future research on the FFR. Most  
404 importantly, however, apart from largely confirming the FFR generating structures as  
405 suggested by Coffey and colleagues, we show that only the right primary auditory cortex  
406 shows a significant effect of attention.

407       Of course, our results do not disprove the presence of attention-related effects on  
408 subcortical regions in general and on subcortical generators of the FFR in particular.  
409 Sufficient evidence for attention effects in auditory subcortical areas and even the cochlea is  
410 available (Giard et al. 1994; Maison et al. 2001; Raizada and Poldrack 2007; Rinne et al.  
411 2008; Wittekindt et al. 2014; Slee and David 2015; Riecke et al. 2018). The perfectly regular  
412 stimulus presentation at 11.1Hz might have lead to cortical entrainment, boosting the signal-

413 to-noise ratio of the cortical generators. However, as stated in the introduction, existing  
414 reports on the presence or absence of attentional effects on the FFR used EEG setups that  
415 strongly assumed the absence of cortical generators to the FFR (Galbraith et al. 2003;  
416 Hoormann et al. 2004; Gutschalk et al. 2008; Lehmann and Schönwiesner 2014; Varghese  
417 et al. 2015). The most prominent “optimization” of the recording setup was that only very few  
418 electrodes were used. If the assumption of the absence or irrelevance of cortical generators  
419 were true, the number and the location of the electrodes should not be relevant. If, as shown  
420 by our results, the FFR evokes strong cortical activity and attention-related effects are strong  
421 in auditory cortical regions, the small number of electrodes and their possibly inconsistent  
422 locations would be highly relevant and could, at least in part, explain the inconsistent results.

423 To conclude, by recording the FFR with the MEG at high temporal and spatial  
424 resolution during a cross-modal attention task and using state-of-the-art source projection  
425 techniques, we confirm that the cortical generators of the FFR exist and demonstrate for the  
426 first time that they are modulated by attention. The lack of an a-priori assumption on the  
427 generators of the FFR allowed us to provide a more differentiated perspective on the  
428 underlying sources of the FFR and its role in auditory processing. Our results strongly  
429 suggest that high-density recording and source projection techniques should be used in  
430 future research to disentangle the diverse contributions from cortical and subcortical regions.

### 431 **Acknowledgements**

432 The authors wish to thank David Opferkuch and Manfred Seiffter for their assistance during  
433 the collection of the data. We would like to also thank Hayley Prins for proofreading the  
434 manuscript. Address of corresponding author: Dr. Thomas Hartmann, Department of  
435 Psychology, University of Salzburg, Hellbrunnerstr. 34, 5020 Salzburg, Austria.

436 **References**

- 437 Akalin-Acar Z, Gençer NG. 2004. An advanced boundary element method (BEM)  
438 implementation for the forward problem of electromagnetic source imaging. *Phys Med*  
439 *Biol.* 49:5011–5028.
- 440 Akhoun I, Gallégo S, Moulin A, Ménard M, Veuillet E, Berger-Vachon C, Collet L, Thai-Van  
441 H. 2008. The temporal relationship between speech auditory brainstem responses and  
442 the acoustic pattern of the phoneme /ba/ in normal-hearing adults. *Clin Neurophysiol.*  
443 119:922–933.
- 444 Batra R, Kuwada S, Maher VL. 1986. The frequency-following response to continuous tones  
445 in humans. *Hear Res.* 21:167–177.
- 446 Bedna J. n.d. Colorcet. Github.
- 447 Bigdely-Shamlo N, Mullen T, Kothe C, Su K-M, Robbins KA. 2015. The PREP pipeline:  
448 standardized preprocessing for large-scale EEG analysis. *Front Neuroinform.* 9:16.
- 449 Boston JR, Møller AR. 1985. Brainstem auditory-evoked potentials. *Crit Rev Biomed Eng.*  
450 13:97–123.
- 451 Brainard DH. 1997. The Psychophysics Toolbox. *Spat Vis.* 10:433–436.
- 452 Brodbeck C. n.d. Eelbrain. Github.
- 453 Brugge JF, Nourski KV, Oya H, Reale RA, Kawasaki H, Steinschneider M, Howard MA 3rd.  
454 2009. Coding of repetitive transients by auditory cortex on Heschl's gyrus. *J*  
455 *Neurophysiol.* 102:2358–2374.
- 456 Brugge JF, Volkov IO, Oya H, Kawasaki H, Reale RA, Fenoy A, Steinschneider M, Howard  
457 MA 3rd. 2008. Functional localization of auditory cortical fields of human: click-train  
458 stimulation. *Hear Res.* 238:12–24.
- 459 Chandrasekaran B, Kraus N. 2010. The scalp-recorded brainstem response to speech:  
460 neural origins and plasticity. *Psychophysiology.* 47:236–246.
- 461 Chandrasekaran B, Skoe E, Kraus N. 2014. An integrative model of subcortical auditory  
462 plasticity. *Brain Topogr.* 27:539–552.

- 463 Choi I, Rajaram S, Varghese LA, Shinn-Cunningham BG. 2013. Quantifying attentional  
464 modulation of auditory-evoked cortical responses from single-trial  
465 electroencephalography. *Front Hum Neurosci.* 7:115.
- 466 Coffey EBJ, Herholz SC, Chepesiuk AMP, Baillet S, Zatorre RJ. 2016. Cortical contributions  
467 to the auditory frequency-following response revealed by MEG. *Nat Commun.* 7:11070.
- 468 Don M, Eggermont JJ. 1978. Analysis of the click-evoked brainstem potentials in man using  
469 high-pass noise masking. *J Acoust Soc Am.* 63:1084–1092.
- 470 Dragicevic CD, Aedo C, León A, Bowen M, Jara N, Terreros G, Robles L, Delano PH. 2015.  
471 The olivocochlear reflex strength and cochlear sensitivity are independently modulated  
472 by auditory cortex microstimulation. *J Assoc Res Otolaryngol.* 16:223–240.
- 473 Eggermont JJ, Don M. 1986. Mechanisms of central conduction time prolongation in brain-  
474 stem auditory evoked potentials. *Arch Neurol.* 43:116–120.
- 475 Eggermont JJ, Don M, Brackmann DE. 1980. Electrocochleography and auditory brainstem  
476 electric responses in patients with pontine angle tumors. *Ann Otol Rhinol Laryngol*  
477 *Suppl.* 89:1–19.
- 478 Eggermont JJ, Salamy A. 1988. Maturational time course for the ABR in preterm and full  
479 term infants. *Hear Res.* 33:35–47.
- 480 Felix RA 2nd, Gourévitch B, Portfors CV. 2018. Subcortical pathways: Towards a better  
481 understanding of auditory disorders. *Hear Res.* 362:48–60.
- 482 Filipek PA, Richelme C, Kennedy DN, Caviness VS Jr. 1994. The young adult human brain:  
483 an MRI-based morphometric analysis. *Cereb Cortex.* 4:344–360.
- 484 Fischl B. 2012. FreeSurfer. *Neuroimage.* 62:774–781.
- 485 Fischler MA, Bolles RC. 1981. Random sample consensus: a paradigm for model fitting with  
486 applications to image analysis and automated cartography. *Commun ACM.* 24:381–  
487 395.
- 488 Forte AE, Etard O, Reichenbach T. 2017. The human auditory brainstem response to  
489 running speech reveals a subcortical mechanism for selective attention. *eLife Sciences.*  
490 6:e27203.

- 491 Frey JN, Mainy N, Lachaux J-P, Müller N, Bertrand O, Weisz N. 2014. Selective modulation  
492 of auditory cortical alpha activity in an audiovisual spatial attention task. *J Neurosci.*  
493 34:6634–6639.
- 494 Fritz JB, Elhilali M, David SV, Shamma SA. 2007. Auditory attention--focusing the  
495 searchlight on sound. *Curr Opin Neurobiol.* 17:437–455.
- 496 Galbraith GC, Arbagey PW, Branski R, Comerci N, Rector PM. 1995. Intelligible speech  
497 encoded in the human brain stem frequency-following response. *Neuroreport.* 6:2363–  
498 2367.
- 499 Galbraith GC, Olfman DM, Huffman TM. 2003. Selective attention affects human brain stem  
500 frequency-following response. *Neuroreport.* 14:735–738.
- 501 Giard MH, Collet L, Bouchet P, Pernier J. 1994. Auditory selective attention in the human  
502 cochlea. *Brain Res.* 633:353–356.
- 503 Glasser MF, Coalson TS, Robinson EC, Hacker CD, Harwell J, Yacoub E, Ugurbil K,  
504 Andersson J, Beckmann CF, Jenkinson M, Smith SM, Van Essen DC. 2016. A multi-  
505 modal parcellation of human cerebral cortex. *Nature.* 536:171–178.
- 506 Gramfort A, Luessi M, Larson E, Engemann DA, Strohmeier D, Brodbeck C, Goj R, Jas M,  
507 Brooks T, Parkkonen L, Hämäläinen M. 2013. MEG and EEG data analysis with MNE-  
508 Python. *Front Neurosci.* 7:267.
- 509 Gramfort A, Luessi M, Larson E, Engemann DA, Strohmeier D, Brodbeck C, Parkkonen L,  
510 Hämäläinen MS. 2014. MNE software for processing MEG and EEG data. *Neuroimage.*  
511 86:446–460.
- 512 Greenberg S. 1980. WPP, No. 52: Temporal Neural Coding of Pitch and Vowel Quality.  
513 Working Papers in Phonetics.
- 514 Gross J, Kujala J, Hamalainen M, Timmermann L, Schnitzler A, Salmelin R. 2001. Dynamic  
515 imaging of coherent sources: Studying neural interactions in the human brain. *Proc Natl*  
516 *Acad Sci U S A.* 98:694–699.
- 517 Gutschalk A, Micheyl C, Oxenham AJ. 2008. Neural correlates of auditory perceptual  
518 awareness under informational masking. *PLoS Biol.* 6:e138.

- 519 Hackley SA, Woldorff M, Hillyard SA. 1990. Cross-modal selective attention effects on  
520 retinal, myogenic, brainstem, and cerebral evoked potentials. *Psychophysiology*.  
521 27:195–208.
- 522 Haegens S, Nacher V, Luna R, Romo R, Jensen O. 2011.  $\alpha$ -Oscillations in the monkey  
523 sensorimotor network influence discrimination performance by rhythmical inhibition of  
524 neuronal spiking. *Proc Natl Acad Sci U S A*. 108:19377–19382.
- 525 Hämäläinen MS, Ilmoniemi RJ. 1994. Interpreting magnetic fields of the brain: minimum  
526 norm estimates. *Med Biol Eng Comput*. 32:35–42.
- 527 Händel BF, Haarmeier T, Jensen O. 2011. Alpha oscillations correlate with the successful  
528 inhibition of unattended stimuli. *J Cogn Neurosci*. 23:2494–2502.
- 529 Hoormann J, Falkenstein M, Hohnsbein J. 2004. Effects of spatial attention on the brain  
530 stem frequency-following potential. *Neuroreport*. 15:1539–1542.
- 531 Jas M, Engemann DA, Bekhti Y, Raimondo F, Gramfort A. 2017. Autoreject: Automated  
532 artifact rejection for MEG and EEG data. *Neuroimage*. 159:417–429.
- 533 Jas M, Engemann D, Raimondo F, Bekhti Y, Gramfort A. 2016. Automated rejection and  
534 repair of bad trials in MEG/EEG. In: 2016 International Workshop on Pattern  
535 Recognition in Neuroimaging (PRNI). p. 1–4.
- 536 Jensen O, Mazaheri A. 2010. Shaping functional architecture by oscillatory alpha activity:  
537 gating by inhibition. *Front Hum Neurosci*. 4:186.
- 538 Jewett DL, Romano MN, Williston JS. 1970. Human auditory evoked potentials: possible  
539 brain stem components detected on the scalp. *Science*. 167:1517–1518.
- 540 King C, Warrier CM, Hayes E, Kraus N. 2002. Deficits in auditory brainstem pathway  
541 encoding of speech sounds in children with learning problems. *Neurosci Lett*. 319:111–  
542 115.
- 543 Kleiner M, Brainard D, Pelli D, Ingling A, Murray R, Broussard C. 2007. What's new in  
544 psychtoolbox-3. *Perception*. 36:1–16.
- 545 Kovasi P. 2015. Good Colour Maps: How to Design Them. *arXiv [csGR]*.
- 546 Kraus N, Nicol T. 2014. The Cognitive Auditory System: The Role of Learning in Shaping the

- 547 Biology of the Auditory System. In: Popper AN,, Fay RR, editors. Perspectives on  
548 Auditory Research. New York, NY: Springer New York. p. 299–319.
- 549 Kuwada S, Anderson JS, Batra R, Fitzpatrick DC, Teissier N, D'Angelo WR. 2002. Sources  
550 of the scalp-recorded amplitude-modulation following response. *J Am Acad Audiol.*  
551 13:188–204.
- 552 Lee AKC, Rajaram S, Xia J, Bharadwaj H, Larson E, Hämäläinen MS, Shinn-Cunningham  
553 BG. 2012. Auditory selective attention reveals preparatory activity in different cortical  
554 regions for selection based on source location and source pitch. *Front Neurosci.* 6:190.
- 555 Lehmann A, Schönwiesner M. 2014. Selective attention modulates human auditory  
556 brainstem responses: relative contributions of frequency and spatial cues. *PLoS One.*  
557 9:e85442.
- 558 Liegeois-Chauvel C, Musolino A, Chauvel P. 1991. Localization of the primary auditory area  
559 in man. *Brain.* 114 ( Pt 1A):139–151.
- 560 Lin F-H, Witzel T, Ahlfors SP, Stufflebeam SM, Belliveau JW, Hämäläinen MS. 2006.  
561 Assessing and improving the spatial accuracy in MEG source localization by depth-  
562 weighted minimum-norm estimates. *Neuroimage.* 31:160–171.
- 563 Liu L-F, Palmer AR, Wallace MN. 2006. Phase-locked responses to pure tones in the inferior  
564 colliculus. *J Neurophysiol.* 95:1926–1935.
- 565 Maison S, Micheyl C, Collet L. 2001. Influence of focused auditory attention on cochlear  
566 activity in humans. *Psychophysiology.* 38:35–40.
- 567 Maris E, Oostenveld R. 2007. Nonparametric statistical testing of EEG- and MEG-data. *J*  
568 *Neurosci Methods.* 164:177–190.
- 569 Marsh JT, Brown WS, Smith JC. 1974. Differential brainstem pathways for the conduction of  
570 auditory frequency-following responses. *Electroencephalogr Clin Neurophysiol.* 36:415–  
571 424.
- 572 Mazaheri A, van Schouwenburg MR, Dimitrijevic A, Denys D, Cools R, Jensen O. 2014.  
573 Region-specific modulations in oscillatory alpha activity serve to facilitate processing in  
574 the visual and auditory modalities. *Neuroimage.* 87:356–362.

- 575 Møller AR, Burgess J. 1986. Neural generators of the brain-stem auditory evoked potentials  
576 (BAEPs) in the rhesus monkey. *Electroencephalogr Clin Neurophysiol.* 65:361–372.
- 577 Møller AR, Jannetta PJ. 1983. Interpretation of brainstem auditory evoked potentials: results  
578 from intracranial recordings in humans. *Scand Audiol.* 12:125–133.
- 579 Møller AR, Jannetta PJ, Møller MB. 1981. Neural generators of brainstem evoked potentials.  
580 Results from human intracranial recordings. *Ann Otol Rhinol Laryngol.* 90:591–596.
- 581 Møller MB, Møller AR. 1983. Brainstem auditory evoked potentials in patients with  
582 cerebellopontine angle tumors. *Ann Otol Rhinol Laryngol.* 92:645–650.
- 583 Morey RD, Others. 2008. Confidence intervals from normalized data: A correction to  
584 Cousineau (2005). *Reason.* 4:61–64.
- 585 Musacchia G, Sams M, Skoe E, Kraus N. 2007. Musicians have enhanced subcortical  
586 auditory and audiovisual processing of speech and music. *Proc Natl Acad Sci U S A.*  
587 104:15894–15898.
- 588 Parkkonen L, Fujiki N, Mäkelä JP. 2009. Sources of auditory brainstem responses revisited:  
589 contribution by magnetoencephalography. *Hum Brain Mapp.* 30:1772–1782.
- 590 Raizada RDS, Poldrack RA. 2007. Challenge-driven attention: interacting frontal and  
591 brainstem systems. *Front Hum Neurosci.* 1:3.
- 592 Riecke L, Peters JC, Valente G, Poser BA, Kemper VG, Formisano E, Sorger B. 2018.  
593 Frequency-specific attentional modulation in human primary auditory cortex and  
594 midbrain. *Neuroimage.* 174:274–287.
- 595 Rinne T, Balk MH, Koistinen S, Autti T, Alho K, Sams M. 2008. Auditory selective attention  
596 modulates activation of human inferior colliculus. *J Neurophysiol.* 100:3323–3327.
- 597 Rouiller E, de Ribaupierre Y, de Ribaupierre F. 1979. Phase-locked responses to low  
598 frequency tones in the medial geniculate body. *Hear Res.* 1:213–226.
- 599 Russo N, Nicol T, Musacchia G, Kraus N. 2004. Brainstem responses to speech syllables.  
600 *Clin Neurophysiol.* 115:2021–2030.
- 601 Salo E, Salmela V, Salmi J, Numminen J, Alho K. 2017. Brain activity associated with  
602 selective attention, divided attention and distraction. *Brain Res.* 1664:25–36.



- 603 Seidman LJ, Faraone SV, Goldstein JM, Goodman JM, Kremen WS, Toomey R, Tourville J,  
604 Kennedy D, Makris N, Caviness VS, Tsuang MT. 1999. Thalamic and amygdala-  
605 hippocampal volume reductions in first-degree relatives of patients with schizophrenia:  
606 an MRI-based morphometric analysis. *Biol Psychiatry*. 46:941–954.
- 607 Skoe E, Kraus N. 2010. Auditory brain stem response to complex sounds: a tutorial. *Ear*  
608 *Hear*. 31:302–324.
- 609 Slee SJ, David SV. 2015. Rapid Task-Related Plasticity of Spectrotemporal Receptive Fields  
610 in the Auditory Midbrain. *J Neurosci*. 35:13090–13102.
- 611 Smith SM, Nichols TE. 2009. Threshold-free cluster enhancement: addressing problems of  
612 smoothing, threshold dependence and localisation in cluster inference. *Neuroimage*.  
613 44:83–98.
- 614 Stipdonk LW, Weisglas-Kuperus N, Franken M-CJ, Nasserinejad K, Dudink J, Goedegebure  
615 A. 2016. Auditory brainstem maturation in normal-hearing infants born preterm: a meta-  
616 analysis. *Dev Med Child Neurol*. 58:1009–1015.
- 617 Suga N. 2008. Role of corticofugal feedback in hearing. *J Comp Physiol A Neuroethol Sens*  
618 *Neural Behav Physiol*. 194:169–183.
- 619 Terreros G, Delano PH. 2015. Corticofugal modulation of peripheral auditory responses.  
620 *Front Syst Neurosci*. 9:134.
- 621 Tzounopoulos T, Kraus N. 2009. Learning to encode timing: mechanisms of plasticity in the  
622 auditory brainstem. *Neuron*. 62:463–469.
- 623 Uusitalo MA, Ilmoniemi RJ. 1997. Signal-space projection method for separating MEG or  
624 EEG into components. *Med Biol Eng Comput*. 35:135–140.
- 625 van Straaten HL. 1999. Automated auditory brainstem response in neonatal hearing  
626 screening. *Acta Paediatr Suppl*. 88:76–79.
- 627 Van Veen BD, van Drongelen W, Yuchtman M, Suzuki A. 1997. Localization of brain  
628 electrical activity via linearly constrained minimum variance spatial filtering. *IEEE Trans*  
629 *Biomed Eng*. 44:867–880.
- 630 Varghese L, Bharadwaj HM, Shinn-Cunningham BG. 2015. Evidence against attentional

- 631 state modulating scalp-recorded auditory brainstem steady-state responses. *Brain Res.*  
632 1626:146–164.
- 633 Wallace MN, Anderson LA, Palmer AR. 2007. Phase-locked responses to pure tones in the  
634 auditory thalamus. *J Neurophysiol.* 98:1941–1952.
- 635 Wallace MN, Rutkowski RG, Shackleton TM, Palmer AR. 2000. Phase-locked responses to  
636 pure tones in guinea pig auditory cortex. *Neuroreport.* 11:3989–3993.
- 637 Weise A, Hartmann T, Schröger E, Weisz N, Ruhnau P. 2016. Cross-modal distractors  
638 modulate oscillatory alpha power: the neural basis of impaired task performance.  
639 *Psychophysiology.*
- 640 Winer JA. 2006. Decoding the auditory corticofugal systems. *Hear Res.* 212:1–8.
- 641 Wittekindt A, Kaiser J, Abel C. 2014. Attentional modulation of the inner ear: a combined  
642 otoacoustic emission and EEG study. *J Neurosci.* 34:9995–10002.
- 643 Woldorff M, Hansen JC, Hillyard SA. 1987. Evidence for effects of selective attention in the  
644 mid-latency range of the human auditory event-related potential. *Electroencephalogr*  
645 *Clin Neurophysiol Suppl.* 40:146–154.
- 646 Worden FG, Marsh JT. 1968. Frequency-following (microphonic-like) neural responses  
647 evoked by sound. *Electroencephalogr Clin Neurophysiol.* 25:42–52.

648 **Supplementary Table**

| ROI                   | Significant Time Periods | p-Values |
|-----------------------|--------------------------|----------|
| Left Auditory Cortex  | 41ms - 46ms              | 0.010    |
|                       | 52ms - 67ms              | 0.024    |
| Right Auditory Cortex | 35ms - 63ms              | 0.007    |
| Left Thalamus         | 40ms - 66ms              | 0.003    |
| Right Thalamus        | 45ms - 59ms              | 0.013    |
| Brainstem             | 13ms - 18ms              | 0.037    |

Supplementary Table 1: Time Periods of significant FFR for each ROI

649 **Parameters of autoreject**

650 RANSAC: n\_resample=50, min\_channels=0.25, min\_corr=0.4, unbroken\_time=0.4

651 Local autoreject: n\_interpolate=[1, 4, 32], consensus=[0, 0.25, 0.5, 0.75, 1]
